# Supplementary material for: A Multi-Cohort and Multi-Omics Meta-Analysis Framework to Identify Network-Based Gene Signatures
Source: PubMed Central journal article supplement (PMC6434849; doi:10.3389/fgene.2019.00159), 2019-03-19
Supplement: Data_Sheet_1.pdf [file Data_Sheet_1.pdf]

# Supplementary Material:

## A multi-cohort and multi-omics meta-analysis framework to identify network-based gene signatures

### 1 DATASET DESCRIPTION

All the discovery datasets are downloaded from Gene Expression Omnibus (GEO) (Barrett et al., 2005), while all the independent validation datasets are obtained from GEO, TCGA [<http://cancergenome.nih.gov>] and CGGA (Sun et al., 2014; Yan et al., 2012). Summary of the datasets for both glioblastoma (GBM) and low-grade glioma (LGG) are provided in the Table S1 and S2.

**Table S1. Summary of the datasets used for GBM study.** 9 independent datasets containing a total of 622 samples (533 GBM vs 89 normal) were used as discovery datasets whereas 2 independent datasets containing a total of 584 samples were used for validation purposes.

|    | Datasets   | Discovery/validation | Data type | Number of samples | Contrast            | Platform                     |
|----|------------|----------------------|-----------|-------------------|---------------------|------------------------------|
| 1  | GSE7696    | Discovery            | GE        | 64                | 59 GBM vs 5 normal  | Affymetrix HG U133 Plus 2.0  |
| 2  | GSE4290    | Discovery            | GE        | 100               | 77 GBM vs 23 normal | Affymetrix HG U133 Plus 2.0  |
| 3  | GSE90598   | Discovery            | GE        | 23                | 16 GBM vs 7 normal  | Affymetrix HG 2.1 ST Array   |
| 4  | GSE22866   | Discovery            | GE        | 46                | 40 GBM vs 6 normal  | Agilent-WHG Microarray 4x44K |
| 5  | GSE60274   | Discovery            | DM        | 64                | 59 GBM vs 5 normal  | Illumina HumanMethylation450 |
| 6  | GSE22867   | Discovery            | DM        | 60                | 56 GBM vs 4 normal  | Illumina HumanMethylation27  |
| 7  | GSE50923   | Discovery            | DM        | 78                | 54 GBM vs 24 normal | Illumina HumanMethylation27  |
| 8  | GSE79122   | Discovery            | DM        | 45                | 36 GBM vs 9 normal  | Illumina HumanMethylation450 |
| 9  | GSE36278   | Discovery            | DM        | 142               | 136 GBM vs 6 normal | Illumina HumanMethylation450 |
| 10 | TCGA (GBM) | Validation           | GE        | 525               | 525 GBM             | Illumina HiSeq/GASeq RNASeq  |
| 11 | GSE4412    | Validation           | GE        | 59                | 59 GBM              | Affymetrix HG U133 A         |

**Table S2. Summary of the datasets used for LGG study.** 8 independent datasets containing a total of 1,787 samples (1,026 LGG vs 761 others) were used as discovery datasets whereas 2 independent datasets containing a total of 642 samples were used for validation purposes.

|    | Datasets    | Discovery/validation | Data type | Number of samples | Contrast              | Platform                     |
|----|-------------|----------------------|-----------|-------------------|-----------------------|------------------------------|
| 1  | GSE16011_C1 | Discovery            | GE        | 117               | 109 LGG vs 8 normal   | Affymetrix HG U133 Plus 2.0  |
| 2  | GSE16011_C2 | Discovery            | GE        | 268               | 109 LGG vs 159 GBM    | Affymetrix HG U133 Plus 2.0  |
| 3  | GSE4290     | Discovery            | GE        | 99                | 76 LGG vs 23 normal   | Affymetrix HG U133 Plus 2.0  |
| 4  | GSE68848    | Discovery            | GE        | 243               | 215 LGG vs 28 normal  | Affymetrix HG U133 Plus 2.0  |
| 5  | GSE4271     | Discovery            | GE        | 100               | 24 LGG vs 76 GBM      | Affymetrix HG U133 A         |
| 6  | GSE90496    | Discovery            | DM        | 420               | 301 LGG vs 119 normal | Illumina HumanMethylation450 |
| 7  | GSE109379   | Discovery            | DM        | 428               | 104 LGG vs 324 GBM    | Illumina HumanMethylation450 |
| 8  | GSE53227    | Discovery            | DM        | 112               | 88 LGG vs 24 GBM      | Illumina HumanMethylation27  |
| 9  | TCGA (LGG)  | Validation           | GE        | 515               | 515 LGG               | Illumina HiSeq/GASeq RNASeq  |
| 10 | CGGA        | Validation           | GE        | 170               | 170 LGG               | Agilent-WHG Microarray 4x44K |

## 2 DATA PREPROCESSING AND NORMALIZATION

The R programming language is used to generate the results included in this manuscript.

### 2.1 Gene expression datasets

For all the gene expression datasets from GEO, we download the raw probe level data and apply the same normalization procedure to make it consistent. Eight out of nine datasets are from Affymetrix platform, which are normalized using RMA background adjustment, quantile normalization and median polish summarization. We use the *threestep* function from *affyPLM* package to achieve this goal Bolstad (2004). For probe to gene mapping, standard genome wide annotation packages are used from bioconductor. Median values are taken whenever multiple probes mapped to the same gene. One dataset is from Agilent platform, which is normalized using *limma* package.

For the TCGA validation datasets, we download preprocessed mRNASeq data. We removed the samples that have more than 10% missing genes. We then removed the genes that have missing values in any of the remaining samples. For the CGGA validation dataset, we download the normalized dataset coming from Agilent-WHG Microarray 4x44K platform. Median values are taken whenever multiple probes mapped to the same gene.

### 2.2 DNA methylation datasets

For three out of eight DNA methylation datasets (GSE60274, GSE90496, and GSE109379), raw IDAT files were available. All three of these datasets are coming from Illumina Infinium HumanMethylation 450K platform. We normalize these datasets using the *preprocessFunnorm* function from *minfi* package (Aryee et al., 2014). For the other five DNA methylation datasets are coming from both Illumina Infinium HumanMethylation 27K and 450K platforms. For these datasets, we download the normalized probe level beta values.

After normalization, methylation levels of the CpG sites are quantified using beta values which is ranged from 0 to 1. A value close to 0 denotes low methylation level whereas a value close to 1 denotes high methylation level. CpG sites with missing values were removed from further analysis. For 27K datasets, we removed the CpG sites that are on the sex chromosomes and map probes to genes. For probe to gene mapping, standard genome wide annotation packages are used from bioconductor. Median values are taken whenever multiple probes mapped to the same gene.

For 450K datasets, we remove the CpG sites: (i) that are located on the sex chromosomes, (ii) that contain known SNPs, and (iii) that have lower detection p-value in more than 10% of the samples. While estimating methylation levels of the genes, we require each gene to have at least 3 CpG sites while each of these CpG sites to fall in transcription start sites (TSS) or 5' untranslated region (5' UTR) or 1st exon. Since the platform contains multiple CpG sites mapping to one gene, we collapsed the CpG sites that map to a single gene by taking their median methylation value. This procedure can be replaced with any other sophisticated function such as taking the CpG sites that are correlated each other.



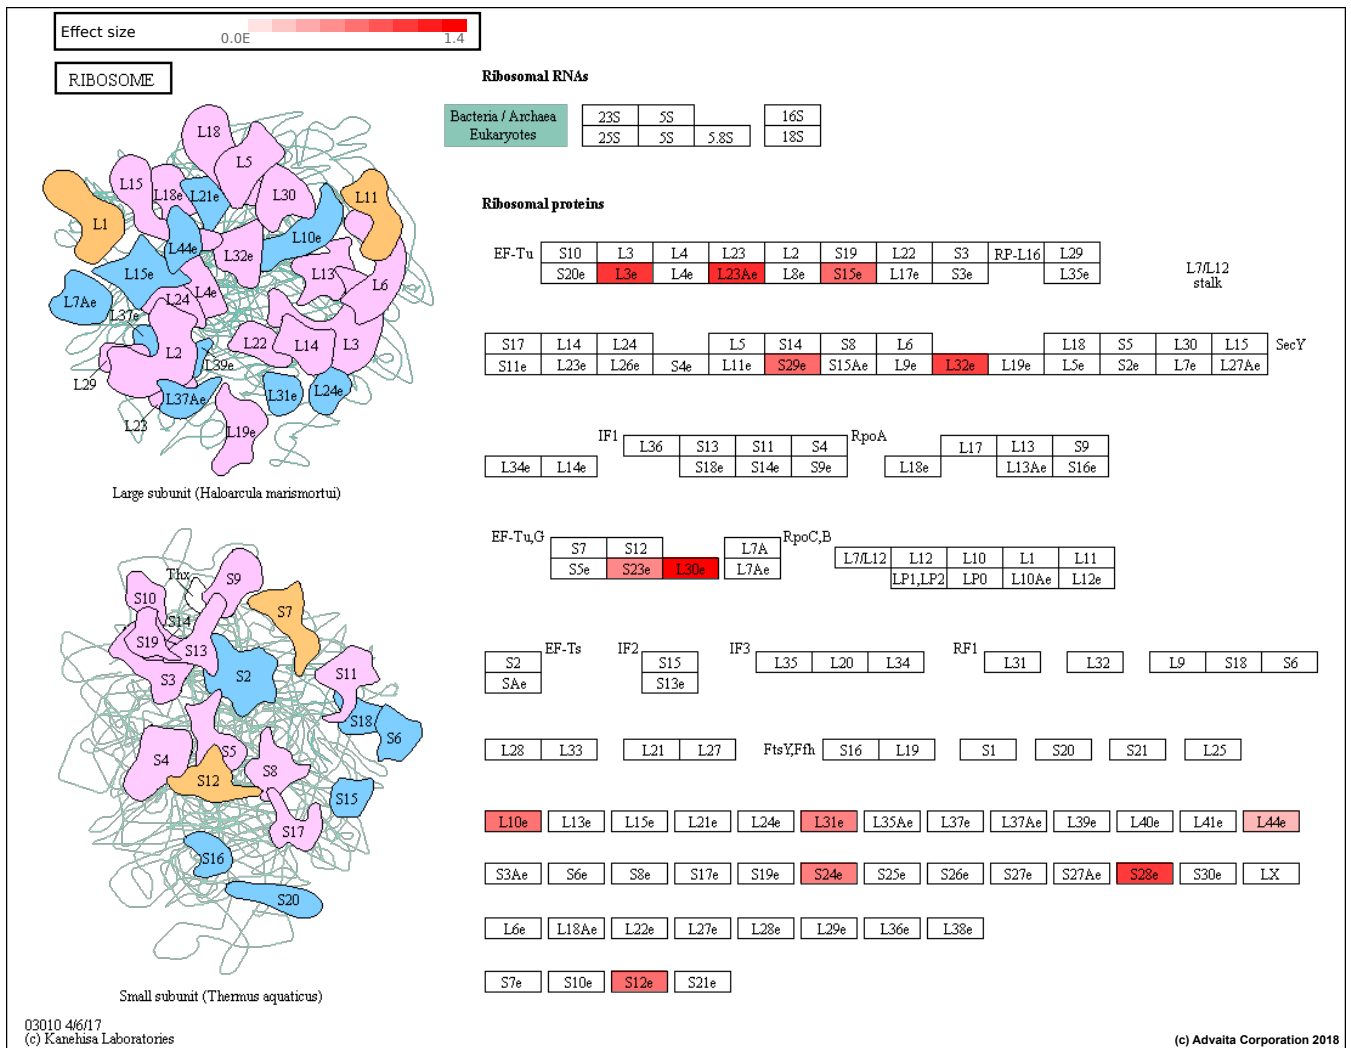

**Figure S2.** The Ribosome pathway is significantly impacted with the proposed gene signature related to LGG. The colors of the nodes represent the effect sizes obtained from the meta-analysis step described in Figure 1A of the manuscript: red represents genes with a positive effect size while blue represents genes with a negative effect size.

**Table S4.** The list of 46 genes present in the proposed network-based signature for GBM

|        |        |        |        |        |
|--------|--------|--------|--------|--------|
| ADCY2  | DTX3L  | GNG12  | NPY1R  | TRIM4  |
| ADCY5  | FBXL16 | GNG3   | NPY5R  | UBE2A  |
| ANXA1  | FBXO2  | GNG5   | RBCK1  | UBE2E2 |
| C3     | FBXO27 | GRM2   | RNF114 | UBE2G2 |
| C5AR1  | FBXO41 | GRM3   | RNF138 | UBE2L6 |
| CCL5   | FBXO44 | HERC5  | RNF7   | WSB1   |
| CDC20  | FBXW9  | HTR1E  | S1PR1  |        |
| CUL2   | GNAI3  | HTR5A  | SOCS1  |        |
| CXCL16 | GNB2   | KLHL20 | STUB1  |        |
| CXCR4  | GNB4   | LPAR1  | TRIM21 |        |

**Table S5.** The list of 20 genes present in the proposed network-based signature for LGG

|        |         |
|--------|---------|
| EIF2S3 | RPL31   |
| EIF3F  | RPL32   |
| EIF3H  | RPL36AL |
| EIF3K  | RPL39L  |
| EIF4B  | RPS12   |
| EIF5   | RPS15   |
| RPL10L | RPS23   |
| RPL23A | RPS24   |
| RPL3   | RPS28   |
| RPL30  | RPS29   |

## REFERENCES

- Aryee, M. J., Jaffe, A. E., Corrada-Bravo, H., Ladd-Acosta, C., Feinberg, A. P., Hansen, K. D., et al. (2014). Minfi: a flexible and comprehensive Bioconductor package for the analysis of Infinium DNA methylation microarrays. *Bioinformatics* 30, 1363–1369
- Barrett, T., Suzek, T. O., Troup, D. B., Wilhite, S. E., Ngau, W. C., Ledoux, P., et al. (2005). NCBI GEO: mining millions of expression profiles—database and tools. *Nucleic Acids Research* 33, D562–6
- Bolstad, B. M. (2004). *Low-level analysis of high-density oligonucleotide array data: background, normalization and summarization*. Ph.D. thesis, University of California
- Sun, Y., Zhang, W., Chen, D., Lv, Y., Zheng, J., Lilljebjörn, H., et al. (2014). A glioma classification scheme based on coexpression modules of EGFR and PDGFRA. *Proceedings of the National Academy of Sciences* 111, 3538–3543
- The Cancer Genome Atlas Research Network (2013). The somatic genomic landscape of glioblastoma. *Cell* 155, 462–477. doi:10.1016/j.cell.2013.09.034
- Yan, W., Zhang, W., You, G., Zhang, J., Han, L., Bao, Z., et al. (2012). Molecular classification of gliomas based on whole genome gene expression: a systematic report of 225 samples from the Chinese Glioma Cooperative Group. *Neuro-oncology* 14, 1432–1440
